# Supplementary material
Source: PubMed Central journal article supplement (PMC6930687)

Fig. S4

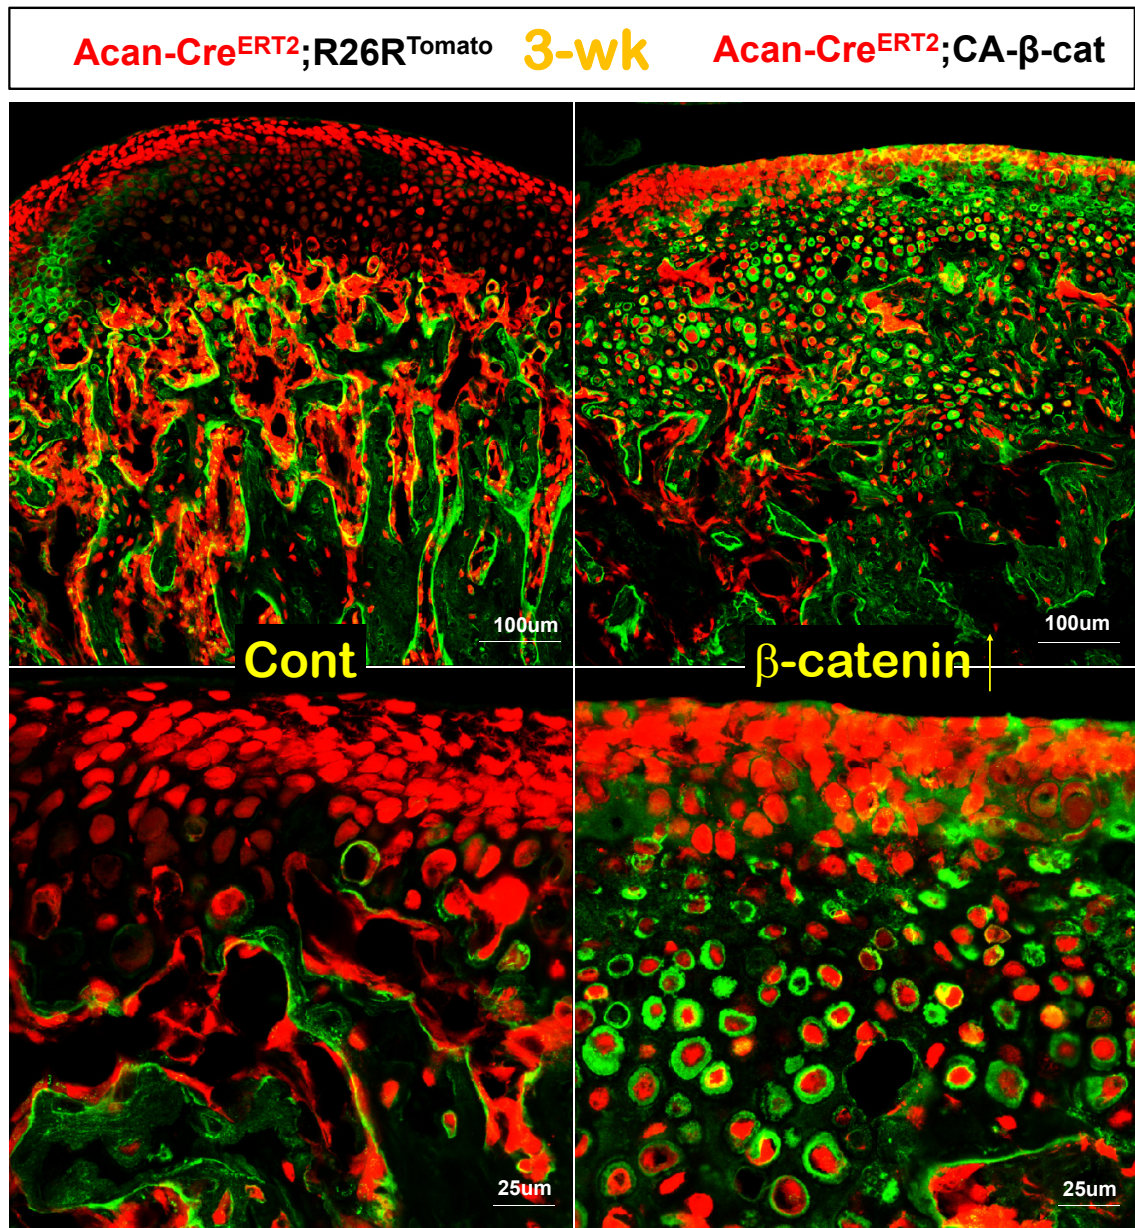

Supplement: NIHMS1545054-supplement-Figure_S4.pdf [file NIHMS1545054-supplement-Figure_S4.pdf]
